# Supplementary material
Source: publisher figshare collection journal article supplement (https://karger.figshare.com/ndownloader/files/30459309)
Supplement: Supplementary file 1 [file 30459309]

**Supplementary table 1:** Genotype distribution and association of selected variants in the hepatobiliary transporter genes *ABCB4 and ABCB11* in patients with idiopathic cholestasis (only subgroup with isolated GGT elevation) and controls

**Polymorphism Cholestasis Control Tests for association***

**cohort n (%) cohort n (%) OR chi2 p-value**

**ABCB4**

*c.504T>C (rs1202283)* n = 25 n = 252

CC 7 (28) 76 (30.1)

TC 11 (44) 135 (53.6) n.s.

TT 7 (28) 41 (16.3)

*c.711A>T (rs2109505)* n = 40 n = 251

TT 0 (0) 6 (2.4)

AT 6 (15) 68 (27.1) 3.31 3.94 **0.047**

AA 34 (85.0) 177 (70.5)

**ABCB11**

*p.A444V (rs2287622)* n = 40 n = 252

CC 13 (32.5) 84 (33.3)

CT 23 (57.5) 126 (50.0) n.s.

TT 4 (10) 42 (16.7)

*c.3084A>G (rs497692)* n = 40 n = 252

GG 13 (32.5) 68 (27.0)

AG 21 (52.5) 115 (45.6) n.s.

AA 6 (15) 69 (27.4)

*Armitage´s trend test.
